# Supplementary material
Source: PubMed Central journal article supplement (PMC4188700)

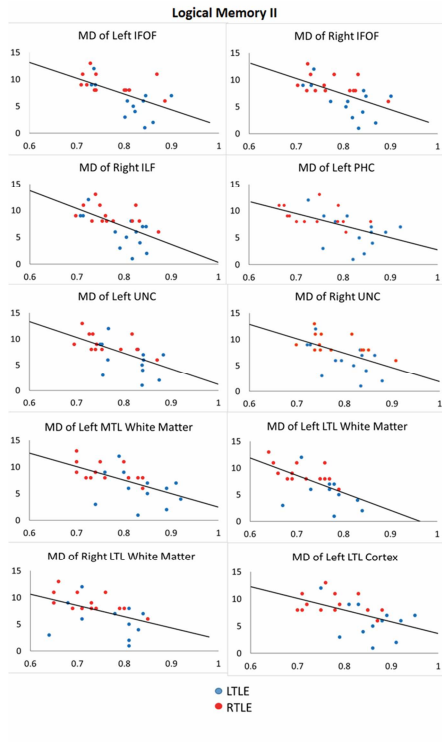

Supplement: NIHMS612959-supplement-01.pdf [file NIHMS612959-supplement-01.pdf]
